# Supplementary material
Source: PubMed Central journal article supplement (PMC5986695)
Supplement: mmc1.pdf [file mmc1.pdf]

## Supplemental Data

### Whole-Exome Sequencing Reveals

### Uncaptured Variation and Distinct Ancestry

### in the Southern African Population of Botswana

Gaone Retshabile, Busisiwe C. Mlotshwa, Lesedi Williams, Savannah Mwesigwa, Gerald Mboowa, Zhuoyi Huang, Navin Rustagi, Shanker Swaminathan, Eric Katagirya, Samuel Kyobe, Misaki Wayengera, Grace P. Kisitu, David P. Kateete, Eddie M. Wampande, Koketso Maplanka, Ishmael Kasvosve, Edward D. Pettitt, Mogomotsi Matshaba, Betty Nsangi, Marape Marape, Masego Tsimako-Johnstone, Chester W. Brown, Fuli Yu, Adeodata Kekitiinwa, Moses Joloba, Sununguko W. Mpoloka, Graeme Mardon, Gabriel Anabwani, Neil A. Hanchard, and for the Collaborative African Genomics Network (CAfGEN) of the H3Africa Consortium

## **SUPPLEMENTAL DATA**

Supplemental data includes 5 figures and 5 tables

**Figure S1** – Putative Loss-of-function variants in Botswana and Uganda

**Figure S2** - Continental Weir and Cockerham's  $F_{ST}$  comparison

**Figure S3** - Population admixture with 1000 genomes super-populations

**Figure S4** – Principal components analysis and inbreeding coefficients

**Figure S5** – Analysis of ClinVar damaging allele counts in Botswana

**Table S1** - Demographics of the participants

**Table S2** - Self-reported ancestry and Guthrie language classification

**Table S3** - Number of variants identified in each cohort

**Table S4** - Variants used in PCA analyses

**Table S5** - Uncaptured Low-frequency Variants in Botswana (excel sheet)

## Supplemental Figures

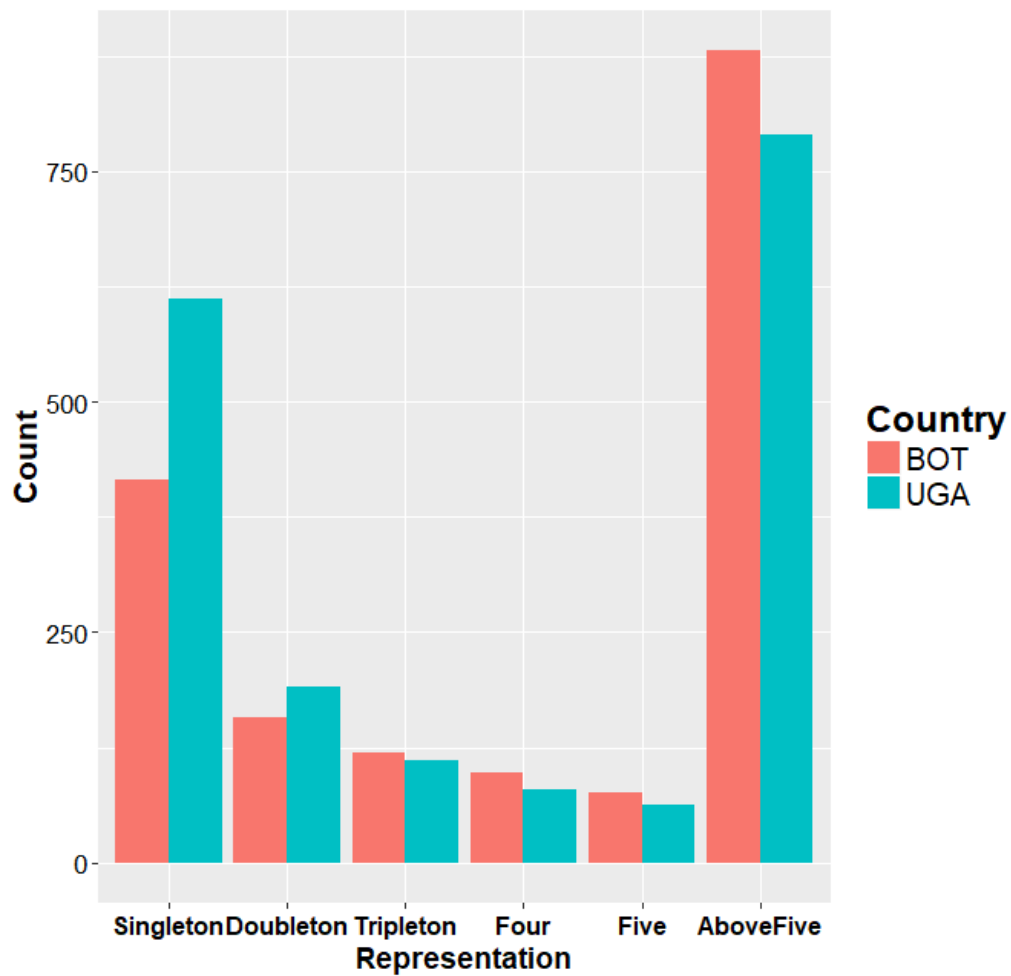

**Figure S1.** Putative loss-of-function variants in Botswana and Uganda population, annotated using ANNOVAR. Exons were defined using the exon start and end positions as defined within the UCSC KnownGene database using Variant Tools software (v2.6.1).

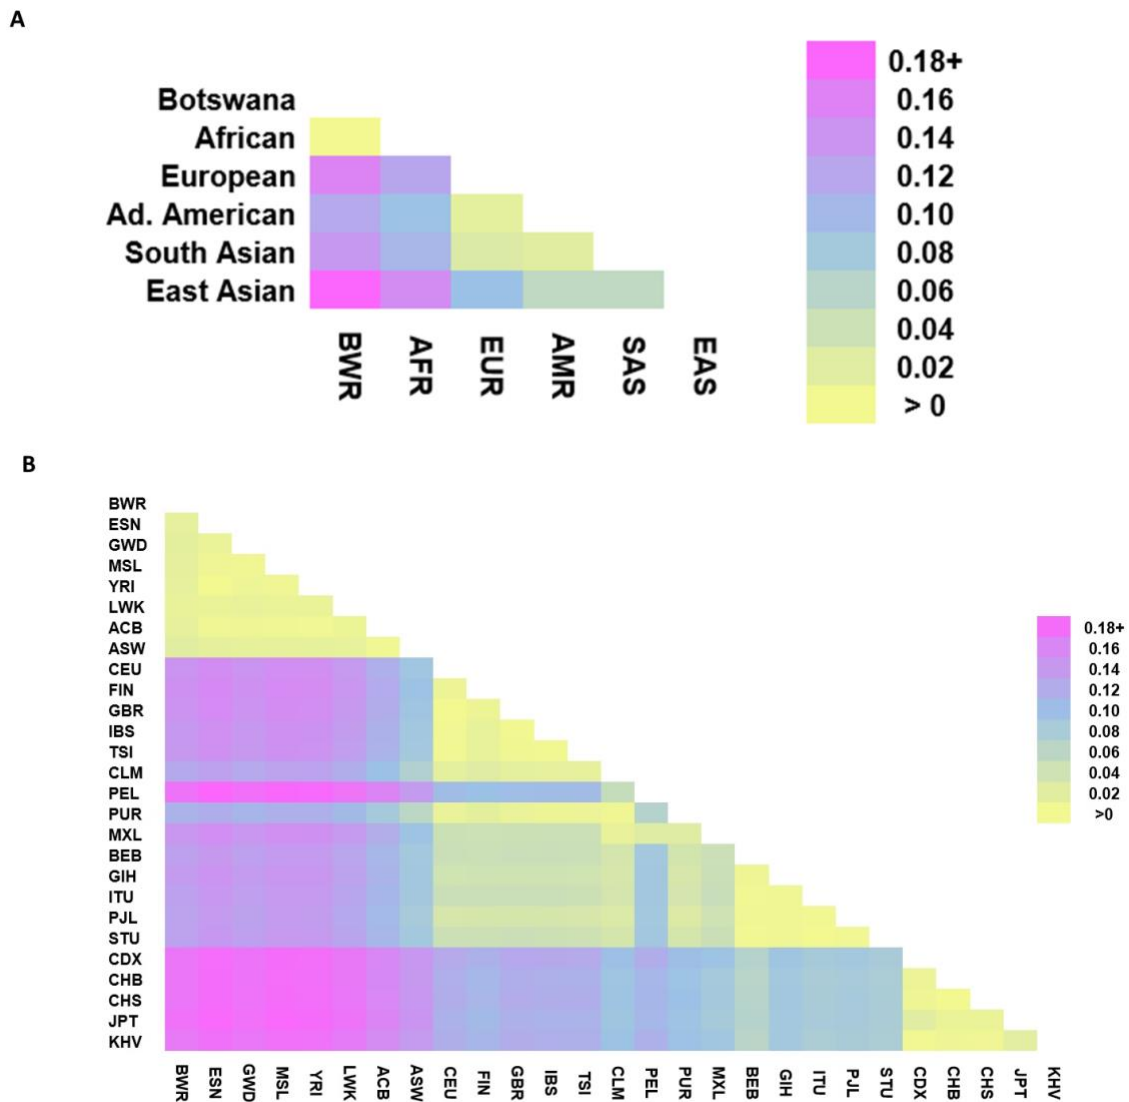

**Figure S2** - Continental Weir and Cockerham's  $F_{ST}$  comparison. Closely related populations have smaller  $F_{ST}$  values, whilst populations with large  $F_{ST}$  values are taken to have higher genetic differentiation. **A** -  $F_{ST}$  comparison between Botswana and continental groupings of the 1000 Genomes data correlates with PCA results indicating affinity of Botswana with other African populations. **B** - Comparison between Botswana and other populations in the 1000 Genomes.

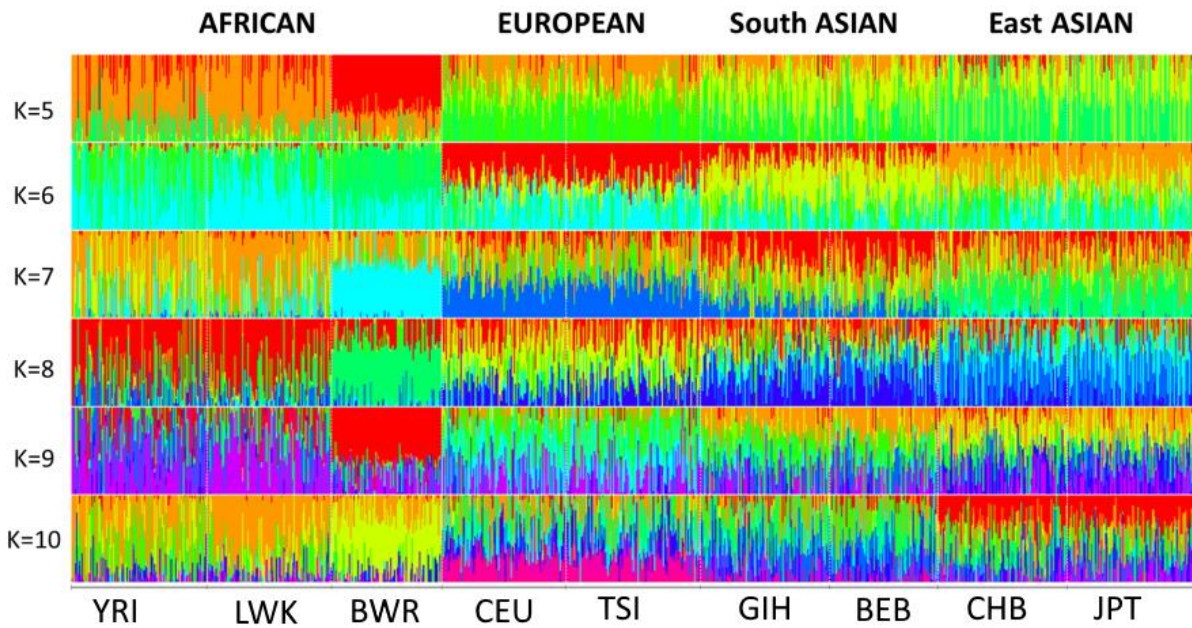

**Figure S3** - Estimation of ancestral population admixture within Batswana and 1000 Genomes populations using unsupervised clustering. Runs for K5 - K10 are shown. At K=7 the Botswana population is best characterised by at least 3 ancestral populations for the majority of the individuals. Most ancestral contributions were African with a minimal Eurasian component as well as a component distinct from the two other African populations in the analysis. YRI – Yoruba in Nigeria; LWK - Luhya in Kenya; BWR – Batswana; CEU – Northern Europeans from Utah; TSI – Tuscans from Italy; GIH - Gujarati Indians from Houston, Texas; BEB - Bengali from Bangladesh; CHB - Han Chinese in Beijing, China; JPT - Japanese in Tokyo, Japan.

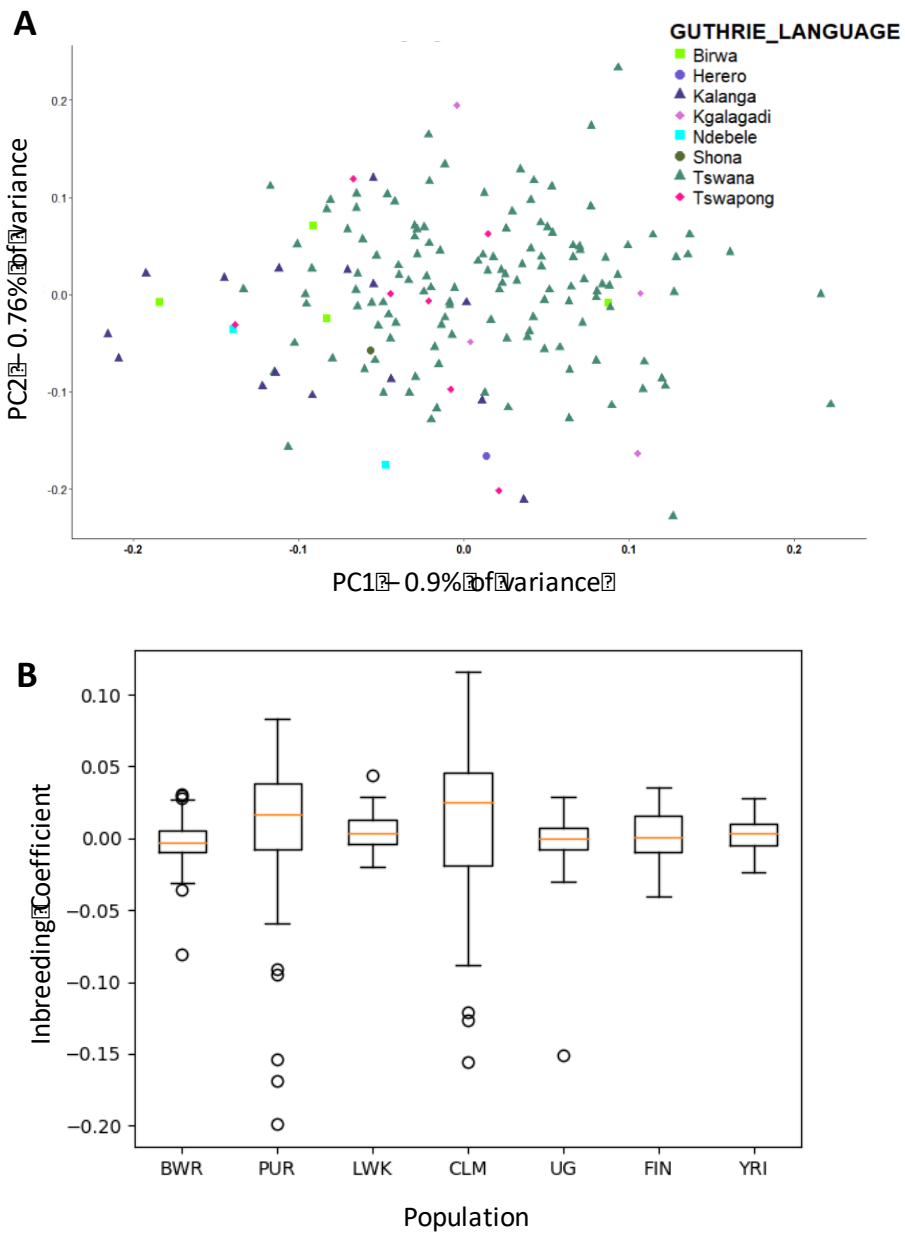

**Figure S4 – S4A** - population structure in Botswana by Guthrie language group; **S4B** - inbreeding coefficients for Botswana (BWR), Uganda (UG), and 1000 Genomes populations assessed in Figure 5.

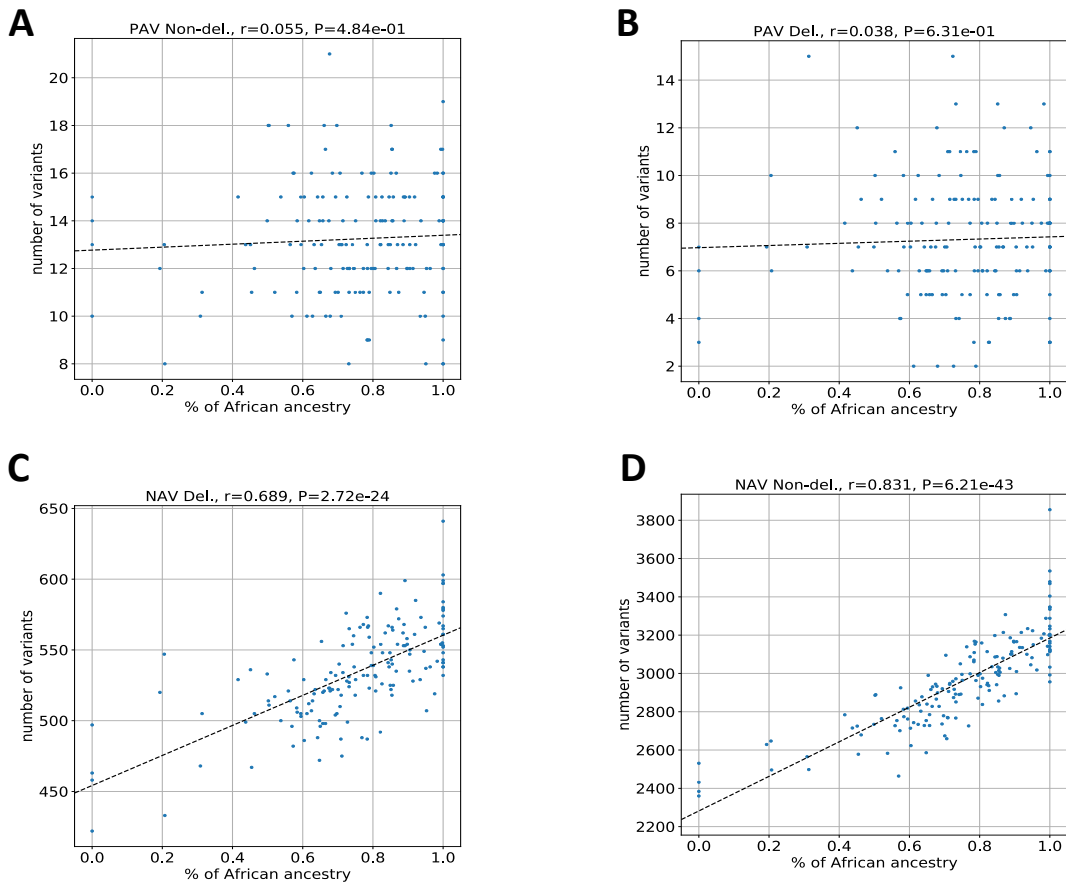

**Figure S5** - The correlation between the number of variants per sample in each classification with the proportion of southern African ancestry. The variants were categorized into four groups: **A** - pathogenic and deleterious (PAV Del.); **B** - pathogenic but not deleterious (PAV Non-del.); **C** - non-pathogenic but deleterious (NAV Del.) and **D** - non-pathogenic and non-deleterious (NAV Non-del.) (see Methods for details of variant classification). The proportion of African ancestry was estimated using ADMIXTURE (K=2). Since the ADMIXTURE was performed over African samples from West, East and Southern African, the x-axis refers to the proportion of Southern African ancestry (see Figure 4).

## Supplemental Tables

**Table S1.** Demographics of the participants. Gender and age distribution of the participants by country and HIV disease progression status.

| <b>Country</b>  | <b>HIV Disease progression status</b> | <b>Male (N)</b> | <b>Female (N)</b> | <b>Median Age</b> |
|-----------------|---------------------------------------|-----------------|-------------------|-------------------|
| <b>Botswana</b> | Rapid Progressors*                    | 60              | 42                | 13                |
|                 | Long-term Non-Progressors*            | 23              | 39                | 19                |
| <b>Uganda</b>   | Rapid Progressors                     | 38              | 33                | 8                 |
|                 | Long-term Non-Progressors             | 33              | 46                | 15                |
| <b>Total</b>    |                                       | <b>154</b>      | <b>160</b>        |                   |

\*Rapid Progressors – World Health Organization (WHO) clinical and immunological criteria for rapid progression: Anti-Retroviral treatment (ART) within 3 years of birth and/or an AIDS defining illness (WHO stage 3 or 4 OR Centers for Disease Control category 3); Two or more CD4 T cell percentage values below 15% within 3 years of birth. Long-term Non-Progressors – WHO clinical and immunological criteria for long term non-progression: Asymptomatic HIV-infection for 10 years or more after initial infection; not needing ART.



**Table S2.** Self-reported ancestry and Guthrie language classification of the Botswana participants

| <b>Self-Reported Ancestry</b> | <b>Guthrie Language Class</b> | <b>No. of participants</b> |
|-------------------------------|-------------------------------|----------------------------|
| Babirwa                       | S32*                          | 4                          |
| Bahurutshe                    | S31                           | 10                         |
| Bakalanga                     | S16                           | 15                         |
| Bakgatla_Kgafela              | S31                           | 15                         |
| Bakgatla_Mmanaana             | S31                           | 11                         |
| Bakwena                       | S31                           | 24                         |
| Balete                        | S31                           | 18                         |
| Bangwaketse                   | S31                           | 13                         |
| Bangwato                      | S31                           | 27                         |
| Barolong                      | S31                           | 3                          |
| Batlokwa                      | S31                           | 9                          |
| Batswapong                    | S32*                          | 7                          |
| Babolaongwe                   | S311                          | 2                          |
| Baphaleng                     | S311                          | 1                          |
| Bashaga                       | S311                          | 1                          |
| Shona                         | S10                           | 1                          |
| Ndebele                       | S40                           | 2                          |
| Herero                        | R31                           | 1                          |

\*The Babirwa and Batswapong are described as speaking two distinct Northern Sotho languages that have come to resemble each other due their proximity rather than their origins<sup>23</sup>.

**Table S3.** Database representation of all WES sequence variants from Botswana and Uganda samples.

|                                 | <b>Botswana<br/>N (%)</b> | <b>Uganda<br/>N (%)</b> |
|---------------------------------|---------------------------|-------------------------|
|                                 | On-target*                | On-target*              |
| <b>Total number of Variants</b> | 191,758                   | 190,584                 |
| <b>dbSNP141_Uncaptured</b>      | 36,432(14.4)              | 32,463(17.0)            |
| <b>ThouGen Uncaptured</b>       | 50,955(26.6)              | 40,243(21.1)            |

\*Vcrome v2.1 bed, KnownGene and ENSEMBL exon positions

**Table S4.** Quality control of autosomal biallelic variant markers used in PCA analysis comparing Batswana to data from 1000 Genomes and African Genome Variation Project.

| <b>Population</b> | <b>Variants</b> | <b>Variants removed</b> | <b>Post QC variants</b> |
|-------------------|-----------------|-------------------------|-------------------------|
| Batswana          | 600,695         | 540,815                 | 59,880                  |
| 1000 Genomes      | 418,913         | 396,519                 | 22,394                  |
| AGVP Sotho        | 2,139,912       | 2,124,068               | 15,844                  |
| AGVP Zulu         | 2,050,451       | 2,035,047               | 15,404                  |
